# Supplementary material for: Biomass-derived B/N/P co-doped porous carbons as bifunctional materials for supercapacitors and sodium-ion batteries
Source: Royal Society of Chemistry journal article supplement (doi:10.1039/d4ta02115k), 2024-01-01
Supplement: d4ta02115k1.pdf [file d4ta02115k1.pdf]

## Supporting Information

### **Biomass-derived B/N/P co-doped porous carbons as bifunctional materials for supercapacitors and sodium-ion batteries**

Yanjiao Li,<sup>a</sup> Xufei Zou,<sup>a</sup> Shiqi Li,<sup>a</sup> Yingying Chen,<sup>\*ab</sup> Guoxiu Wang,<sup>b</sup> Hongxun Yang,<sup>\*a</sup> and Hao Tian<sup>\*b</sup>

<sup>a</sup>School of Environmental and Chemical Engineering, Jiangsu University of Science and Technology, Zhenjiang 212003, Jiangsu, China

<sup>b</sup>Centre for Clean Energy Technology, School of Mathematical and Physical Sciences, Faculty of Science, University of Technology Sydney, Broadway, NSW 2007, Australia.

\*Corresponding author.

Email: scyyh@just.edu.cn (Y. Chen); yhongxun@126.com (H. Yang); hao.tian@uts.edu.au (H. Tian)

## Text S1

From the GCD results, the specific capacitance ( $C_s$ ,  $F\ g^{-1}$ ) of the three-electrode system was calculated according to the following equation S2 (Eq. S2) [1]:

$$C_s = \frac{I \times \Delta t}{m \times \Delta V} \quad (S2)$$

The single electrode specific capacitance of the whole symmetric supercapacitors was obtained by the equation S3 (Eq. S3) [1]:

$$C_{cell} = \frac{4 \times I \times \Delta t}{M \times \Delta V} \quad (S3)$$

In which two-electrode systems, the energy density ( $E$ ,  $Wh\ kg^{-1}$ ) and power density ( $P$ ,  $W\ kg^{-1}$ ) were calculated by the equations S4 and S5 (Eq. S4 and Eq. S5) [1]:

$$E = \frac{\Delta V^2 C_{cell}}{8 \times 3.6} \quad (S4)$$

$$P = \frac{3600 \times E}{\Delta t} \quad (S5)$$

Where  $C_s$  or  $C_{cell}$  ( $F\ g^{-1}$ ) is the gravimetric specific capacitance of active materials,  $I$  (A) represent the constant discharging current,  $\Delta t$  (s) corresponds to the discharge time,  $M$  (g) is the total mass of the positive and negative electrodes and  $\Delta V$  (V) is the voltage change within discharge process.

The interlayer distance ( $d_{002}$ ) was calculated using the (002) graphite diffraction peak and Bragg Eq. (S6) [4]:

$$d_{002} = \frac{\lambda}{2 \sin \theta} \quad (S6)$$

where  $\lambda$  is the X-ray wavelength (0.154 nm) and  $\theta$  is the scattering angle corresponding to the peak position.

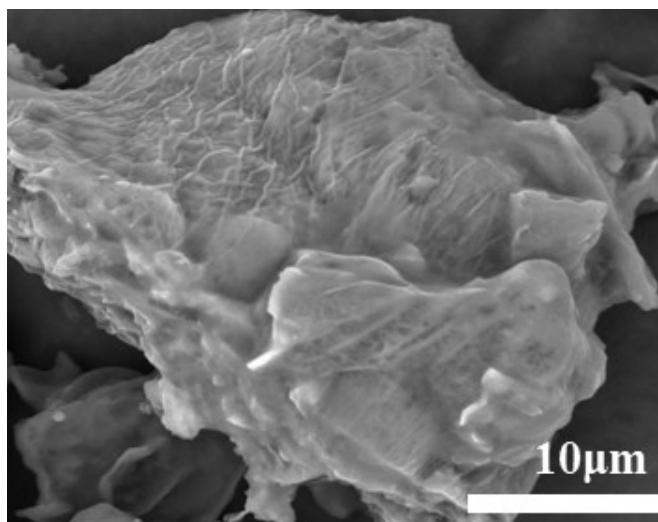

**Fig. S1** The original SEM image of OP.

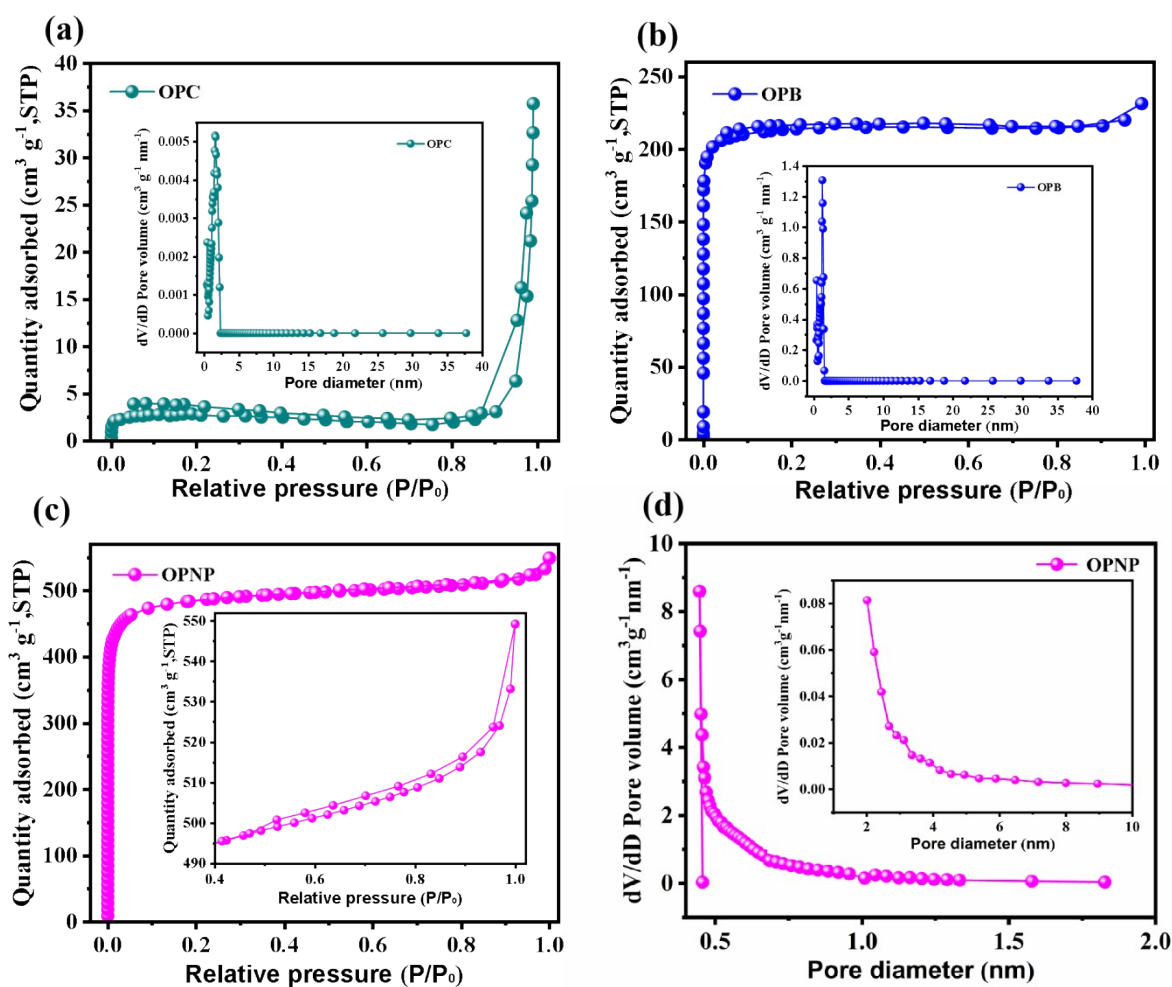

**Fig. S2** (a) N<sub>2</sub> adsorption-desorption isotherms of OPC, inset: pore size distribution; (b) N<sub>2</sub> adsorption-desorption isotherms of OPB, inset: pore size distribution; (c) N<sub>2</sub> adsorption-desorption isotherms of OPNP, inset: partial amplification region; (d) the pore size distribution of OPNP.

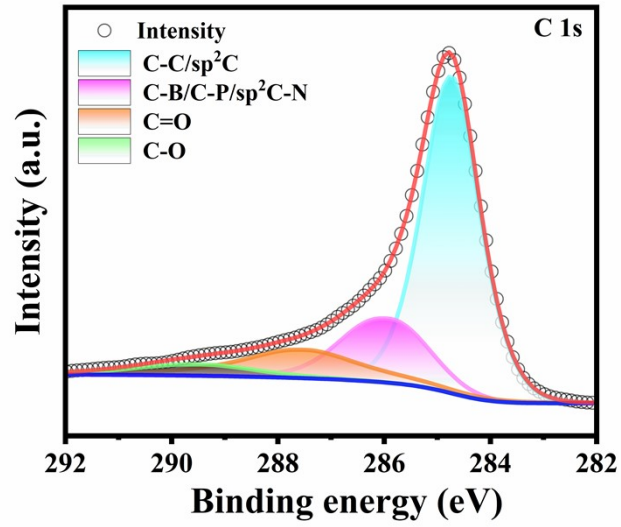

Fig. S3 C 1s high resolution spectra of OPBNP.

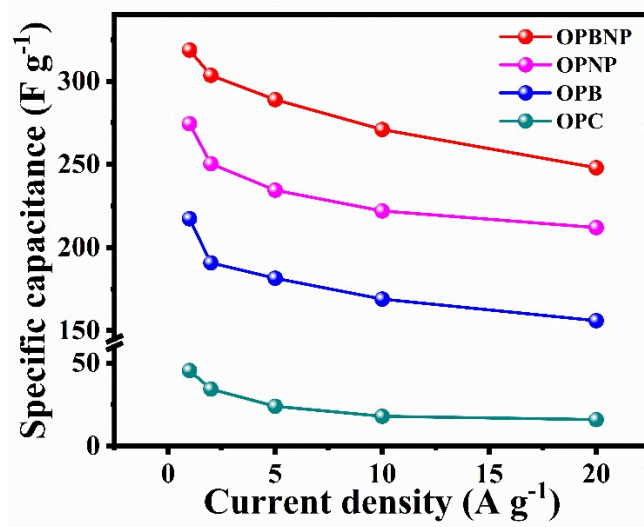

Fig. S4 The OPC, OPB, OPNP, OPBNP specific capacitance values at different current densities.

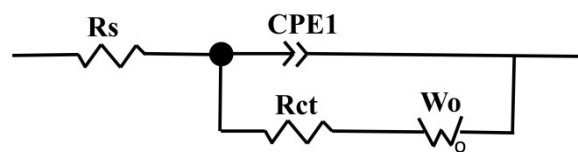

Fig. S5 Equivalent circuit diagram of electrodes.

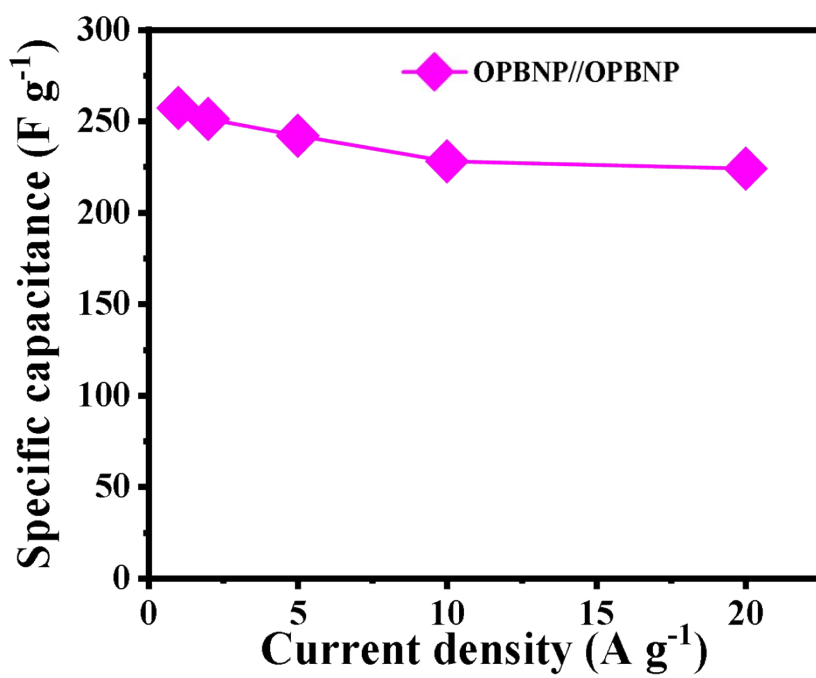

Fig. S6 Specific capacitance at different current densities.

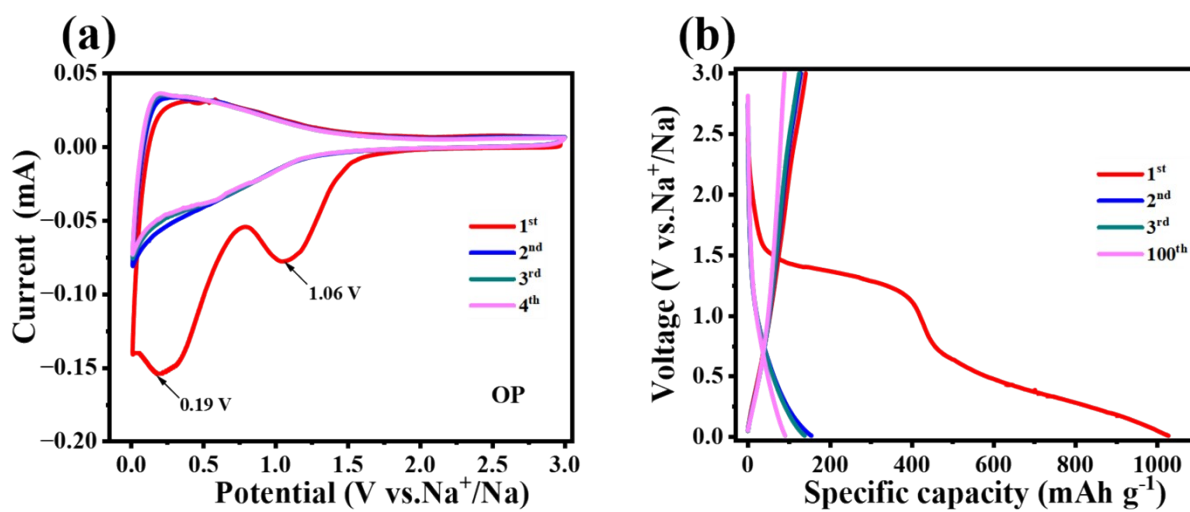

**Fig. S7** CV curves of OPC electrodes (a)  $0.1 \text{ mV s}^{-1}$ ; (b) The charge-discharge curves of the 1<sup>st</sup>, 2<sup>nd</sup>, 3<sup>rd</sup> and 100<sup>th</sup> cycles at  $0.1 \text{ A g}^{-1}$ .

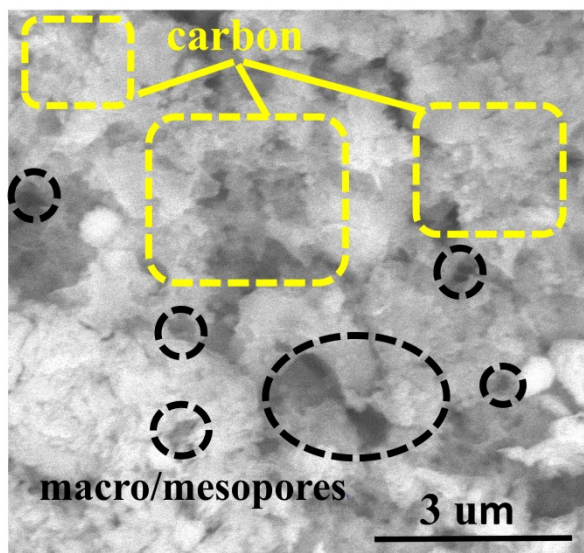

**Fig. S8** SEM image of the OPBNP electrode after 1000 cycles at  $1 \text{ A g}^{-1}$  for SIBs.

**Table S1** Results of charge-discharge specific capacitance and impedance parameters of three-electrode system at different current densities.

| Current density<br>(A g <sup>-1</sup> ) |                 | Specific capacitance<br>(F g <sup>-1</sup> ) |       |       |       |
|-----------------------------------------|-----------------|----------------------------------------------|-------|-------|-------|
|                                         |                 | OPC                                          | OPB   | OPNP  | OPBNP |
| 1                                       |                 | 45.5                                         | 217.3 | 274.5 | 318.8 |
| 2                                       |                 | 34.4                                         | 190.8 | 250.4 | 303.6 |
| 5                                       |                 | 24.0                                         | 181.5 | 234.5 | 289.0 |
| 10                                      |                 | 18                                           | 169.0 | 222.0 | 271.0 |
| 20                                      |                 | 16                                           | 156.0 | 212.0 | 248.0 |
| Efficiency (%)                          |                 | 35.2                                         | 71.7  | 77.2  | 77.8  |
| Impedance (Ω)                           | R <sub>s</sub>  | 0.55                                         | 0.61  | 0.60  | 0.54  |
|                                         | R <sub>ct</sub> | 0.092                                        | 0.062 | 0.053 | 0.043 |

**Table S2** Comparisons of specific capacitance (Cs) of nitrogen, phosphorus and other heteroatomic co-doped biomass-derived carbon.

| Carbon source       | Activation method                                             | S <sub>BET</sub> (m <sup>2</sup> g <sup>-1</sup> ) | Cs (F g <sup>-1</sup> ) | Measurement condition                                    | Refs      |
|---------------------|---------------------------------------------------------------|----------------------------------------------------|-------------------------|----------------------------------------------------------|-----------|
| Pomelo peel         | Thermal + (NH <sub>4</sub> ) <sub>2</sub> HPO <sub>4</sub>    | 807                                                | 240                     | 2 M KOH, 0.5 A g <sup>-1</sup>                           | [5]       |
| shrimp shell        | H <sub>3</sub> PO <sub>4</sub>                                | 726                                                | 260                     | 6 M KOH, 0.05 A g <sup>-1</sup>                          | [6]       |
| Walnut shell        | KOH+H <sub>3</sub> PO <sub>4</sub>                            | 2583                                               | 332                     | 6 M KOH, 1 A g <sup>-1</sup>                             | [7]       |
| Silkworm cocoon     | Phytic acid                                                   | 1247.2                                             | 317                     | 1 M H <sub>2</sub> SO <sub>4</sub> , 1 A g <sup>-1</sup> | [8]       |
| Bacterial cellulose | (NH <sub>4</sub> ) <sub>2</sub> HPO <sub>4</sub>              | 731.9                                              | 232                     | 6 M KOH, 1 A g <sup>-1</sup>                             | [9]       |
| Molasses            | Ammonium                                                      | 422.9                                              | 160                     | 6 M KOH, 1 A g <sup>-1</sup>                             | [10]      |
| Tea leaves          | polyphosphate                                                 | 129                                                | 158                     |                                                          |           |
| Duck weed           | KOH                                                           | 1636                                               | 315.2                   | 6 M KOH, 1 A g <sup>-1</sup>                             | [11]      |
| Cicada molasses     | KOH                                                           | 1676                                               | 355                     | 6 M KOH, 1 A g <sup>-1</sup>                             | [12]      |
| Orange peel         | (NH <sub>4</sub> ) <sub>2</sub> HPO <sub>4</sub> + Boric acid | 1774.8                                             | 318.8                   | 6 M KOH, 1 A g <sup>-1</sup>                             | This work |



**Table S3** Comparisons of the electrochemical performances of biomass-derived hard carbon for SIBs.

| Biomass precursor | Calcination temperature (°C) | current density (A g <sup>-1</sup> ) | Reversible capacity (mA h g <sup>-1</sup> ) | Rate (A g <sup>-1</sup> ) | Reversible capacity (mA h g <sup>-1</sup> ) | Refs      |
|-------------------|------------------------------|--------------------------------------|---------------------------------------------|---------------------------|---------------------------------------------|-----------|
| Coconut           |                              |                                      | 270<br>(100 cycles)                         | –                         | –                                           | [1]       |
| Silk              |                              |                                      | 273<br>(100 cycles)                         | –                         | –                                           |           |
| Walnut shell      | 1000                         | 0.1                                  | 305<br>(200 cycles)                         | 1                         | 182<br>(1500 cycles)                        | [13]      |
| Rice husk         | 1200                         | 0.025                                | 328.4<br>(100 cycles)                       | 0.1                       | 232.3<br>(400 cycles)                       | [14]      |
| Gelatin           | 700                          | 0.2                                  | 309<br>(200 cycles)                         | 1                         | 225<br>(2000 cycles)                        | [15]      |
| medicine residue  | 800                          | 0.1                                  | 801<br>(500 cycles)                         | 5                         | 402<br>(500 cycles)                         | [16]      |
| crab shell        | 800                          | 0.03                                 | 339.1<br>(1 <sup>st</sup> )                 | 0.5                       | 132.4<br>(200 cycles)                       | [17]      |
| Reed straw        | 1300                         | 0.025                                | 372.0<br>(1 <sup>st</sup> )                 | 0.1                       | 283.8<br>(200 cycles)                       | [18]      |
| Mushroom stalk    | 900                          | 0.1                                  | 305<br>(10 cycles)                          | –                         | –                                           | [19]      |
| Cirsium setosum   | 700                          | 0.1                                  | 268<br>(100 cycles)                         | 1                         | 198.6<br>(320 cycles)                       | [20]      |
| Mango peel        | 800                          | 0.1                                  | 358<br>(300 cycles)                         | 2                         | 155<br>(2500 cycles)                        | [21]      |
| Orange peel       | 600                          | 0.1                                  | 292.3<br>(100 cycles)                       | 1                         | 205.1<br>(1000 cycles)                      | This work |

**Table S4** Electrochemical impedance parameters of OPC and OPBNP electrodes

| Sample | Impedance ( $\Omega$ ) |       |
|--------|------------------------|-------|
|        | Rs                     | Rct   |
| OPC    | 4.1                    | 291.8 |
| OPBNP  | 3.2                    | 72.4  |

## References

- 1 L. Tang, Y. B. Zhou, X. Y. Zhou, Y. R. Chai, Q. J. Zheng and D. M. Lin, Enhancement in electrochemical performance of nitrogen-doped hierarchical porous carbon-based supercapacitor by optimizing activation temperature, *J. Mater. Sci.*, 2019, **30**, 2600-2609.
- 2 L. H. Cao, H. L. Li, Z. X. Xu, H. J. Zhang, L. H. Ding, S. Q. Wang, G. Y. Zhang, H. Q. Hou, W. H. Xu, F. Yang and S. H. Jiang, Comparison of the heteroatoms-doped biomass-derived carbon prepared by one-step nitrogen-containing activator for high performance supercapacitor, *Diam. Relat. Mater.*, 2021, **114**, 108316.
- 3 G. Y. Zhao, D. F. Yu, C. Chen, L. Sun, C. H. Yang, H. Zhang, B. S. Du, F. F. Sun, Y. Sun and M. Yu, One-step production of carbon nanocages for supercapacitors and sodium-ion batteries, *J. Electroanal. Chem.*, 2020, **878**, 114551.
- 4 C. Nita, B. Zhang, J. Dentzer and C. M. Ghimbeu, Hard carbon derived from coconut shells, walnut shells, and corn silk biomass waste exhibiting high capacity for Na-ion batteries, *J. Energy. Chem.*, 2021, **58**, 207-218.
- 5 Z. Wang, Y. T. Tan, Y. L. Yang, X. N. Zhao, Y. Liu, L. Y. Niu, B. Tichnell, L. B. Kong, L. Kang, Z. Liu and F. Ran, Pomelo peels-derived porous activated carbon microsheets dual-doped with nitrogen and phosphorus for high performance electrochemical capacitors, *J. Power Sources.*, 2018, **378**, 499-510.
- 6 J. Y. Qu, C. Geng, S. Y. Lv, G. H. Shao, S. Y. Ma and M. B. Wu, Nitrogen, oxygen and phosphorus decorated porous carbons derived from shrimp shells for supercapacitors, *Electrochim. Acta.*, 2015, **176**, 982-988.
- 7 X. L. Su, J. R. Chen, G. P. Zheng, J. H. Yang, X. X. Guan, P. Liu and X. C. Zheng, Three-dimensional porous activated carbon derived from loofah sponge biomass for supercapacitor applications, *Applied Surface Science.*, 2018, **436**, 327-336.
- 8 Y. K. Wang, M. K. Zhang, Y. Dai, H. Q. Wang, H. Y. Zhang, Q. Q. Wang, W. B. Hou, H. Yan, W. R. Li and J. C. Zheng, Nitrogen and phosphorus co-doped silkworm-cocoon-based self-activated porous carbon for high performance supercapacitors, *J. Power Sources*, 2019, **438**, 227045.
- 9 D. B. Kong, L. Cao, Z. M. Fang, F. L. Lai, Z. D. Lin, P. Zhang and Wei Li, Low-cost high-performance asymmetric supercapacitors based on ribbon-like Ni(OH)<sub>2</sub> and biomass carbon nanofibers enriched with nitrogen and phosphorus, *Ionics*, 2019, **25**, 4341-4350.
- 10 S. Macchi, N. Siraj, F. Watanabe and T. Viswanathan, Renewable-resource-based waste materials for supercapacitor application, *Chemistry Select.*, 2019, **4**, 492-501.

- 11 T. Wang, J. Z. Zhang, Q. H. Hou and S. Wang, Utilization of nutrient rich duckweed to create N, P Co-doped porous carbons for high performance supercapacitors, *J. Alloys Compd.*, 2019, **771**, 1009-1017.
- 12 H. Y. Jia, J. W. Sun, X. Xie, K. B. Yin and L. T. Sun, Cicada slough-derived heteroatom incorporated porous carbon for supercapacitor: Ultra-high gravimetric capacitance, *Carbon*, 2019, **143**, 309-317.
- 13 Q. Li, Y. N. Zhang, S. A. Feng, D. Liu, G. X. Wang, Q. L. Tan, S. T. Jiang and J. J. Yuan, N, S self-doped porous carbon with enlarged interlayer distance as anode for high performance sodium ion batteries. *Int. J. Energy. Res.*, 2021, **45**, 7082-7092.
- 14 L. Li, M. F. Sun, Z. Z. Xu, Z. Wang, K. Liu, Y. Y. Chen, Z. Wang, H. Chen and H. X. Yang, Hierarchical porous hard carbon derived from rice husks for high-performance sodium ion storage, *Colloid Surface A.*, 2023, **661**, 130927.
- 15 Q. Z. Jin, W. Li, K. L. Wang, H. M. Li, P. Y. Feng, Z. C. Zhang, W. Wang and K. Jiang, Tailoring 2D heteroatom-doped carbon nanosheets with dominated pseudocapacitive behaviors enabling fast and high-performance sodium storage, *Adv. Funct. Mater.*, 2020, **30**, 1909907.
- 16 H. R. Wan, X. R. Shen, H. Jiang, C. Zhang, K. L. Jiang, T. Chen, L. L. Shi, L. M. Dong, C. C. He, Y. Xu, J. Li and Y. Chen, Biomass-derived N/S dual-doped porous hard-carbon as high-capacity anodes for lithium/sodium ions batteries, *Energy*, 2021, **231**, 121102.
- 17 X. X. Xue, Y. J. Weng, Z. D. Jiang, S. C. Yang, Y. K. Wu, S. H. Meng, C. X. Zhang, Q. Sun and Y. L. Zhang, Naturally nitrogen-doped porous carbon derived from waste crab shell as anode material for high performance sodium-ion battery. *J. Anal. Appl. Pyrol.*, 2021, **157**, 105215.
- 18 J. Wang, L. Yan, Q. J. Ren, L. L. Fan, F. M. Zhang and Z. Q. Shi, Facile hydrothermal treatment route of reed straw-derived hard carbon for high performance sodium ion battery. *Electrochim. Acta.*, 2018, **29**, 188-196.
- 19 P. F. Yu, W. C. Zhang, Y. H. Yang, M. T. Zheng, H. Hu, Y. Xiao, Y. L. Liu and Y. R. Liang, Facile construction of uniform ultramicropores in porous carbon for advanced sodium-ion battery. *J. Colloid Interf. Sci.*, 2021, **582**, 852-858.
- 20 L. Y. Cao, Y. Wang, H. L. Hu, J. F. Huang, L. J. Kou, Z. W. Xu and J. Y. Li, N/S co-doped disordered carbon with enlarged interlayer distance derived from cirsiium setosum as high-performance anode for sodium ion batteries. *J. Mater. Sci. Mater. El.*, 2019, **30**, 21323-21331.
- 21 R. Muruganatham, F. M. Wang and W. R. Liu, A green route N, S-doped hard carbon derived from fruit-peel biomass waste as an anode material for rechargeable sodium-ion storage

applications. *Electrochim. Acta.*, 2022, **424**, 140573.
